# Supplementary figures and images for: ALDH2 Repression Promotes Lung Tumor Progression via Accumulated Acetaldehyde and DNA Damage
Source: PubMed Central journal article supplement — Neoplasia. 2019 May 6;21(6):602–14. doi: 10.1016/j.neo.2019.03.008 (PMC6506700; doi:10.1016/j.neo.2019.03.008), 2019-05-06

Supplemental Figure 1

**A**

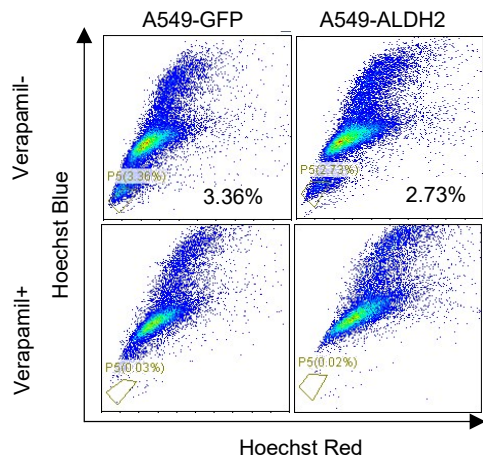

**B**

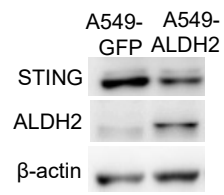

Supplement: mmc1.pdf [file mmc1.pdf]
